# Supplementary material for: A genome-wide survey with different rapeseed ecotypes uncovers footprints of domestication and breeding
Source: PubMed Central journal article supplement (PMC5853444; doi:10.1093/jxb/erx311), 2017-09-11
Supplement: erx311_suppl_supplementary_figuress1-s3-tabless3-s5-s6-s13.pdf [file erx311_suppl_supplementary_figuress1-s3-tabless3-s5-s6-s13.pdf]

## Supporting Information

**Fig. S1** Genome-wide patterns of linkage disequilibrium (LD) across chromosomes in the A (up) and C subgenome (down) of *Brassica napus* measured with 33,186 SNPs.

**Fig. S2** The average distance of LD decay in the A and C subgenomes of *B. napus*.

**Fig. S3** Venny plot of overlapped genes among three data sets in rapeseed and *Arabidopsis*.

**Table S1#** List of rapeseed accessions used in this study.

**Table S2** Genotype data for 327 accessions in this study (<http://pan.baidu.com/s/1kVFPfIP>).

**Table S3** The distribution of SNPs across the 19 chromosomes of the rapeseed genome.

**Table S4#** Physical position of the weak and strong LDs

**Table S5** Homeologous exchanges between the A and C subgenomes in regions for weak and strong LD.

**Table S6** Sequence features of genome regions with weak and strong LD.

**Table S7#** Regions of selective sweep between the winter/spring and semi-winter groups in rapeseed.

**Table S8#** Genes within selective sweep regions between semi-winter and winter/spring groups in rapeseed.

**Table S9#** Functional categories of the genes in the regions of selective sweep between winter/spring and semi-winter groups in rapeseed.

**Table S10#** Regions of selective sweep between spring and winter groups in rapeseed.

**Table S11#** Genes within selective sweep regions between spring and winter groups in rapeseed.

**Table S12#** Functional categories of the genes in the region of selective sweep between spring and winter groups in rapeseed.

**Table S13** QTLs were aligned to selective sweep within the segregation populations derived from hybrid between spring and winter rapeseed reported by Udall *et al.* (2006) and Quijada *et al.* (2006).

**Table S14#** A list of 4,304 genes from genome regions differentiating between winter and spring groups in rapeseed.

**Table S15#** A list of 4,247 differentially expressed genes between winter and spring groups in rapeseed as detected by Lu *et al.* (2014).

**Table S16#** A list of 5,500 differentially expressed genes between summer and winter ecotypes in *Arabidopsis thaliana* as detected by Des Marais *et al.* (2012).

**Table S17#** A list of 202 genes overlapping between the three data sets from rapeseed and *Arabidopsis*.

**Table S18#** The significant SNPs associated with flowering time across 4 years.

#available as a separate file.xlsx.

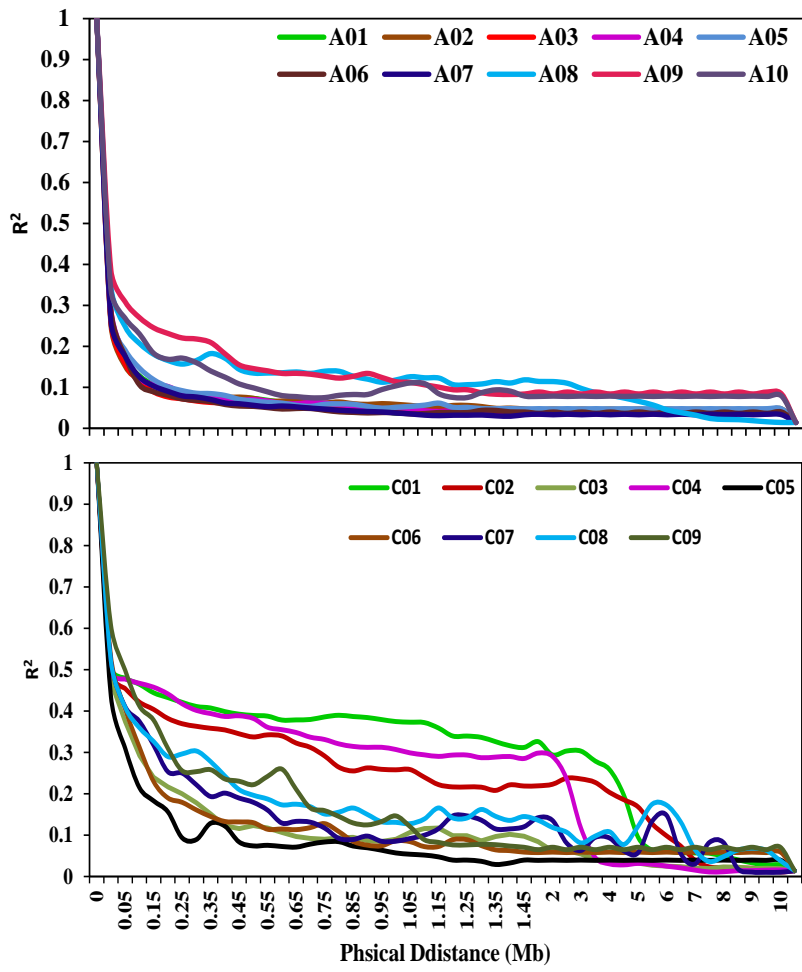

**Fig. S1** Genome-wide patterns of linkage disequilibrium (LD) across chromosomes in the A (up) and C subgenome (down) of *Brassica napus*.

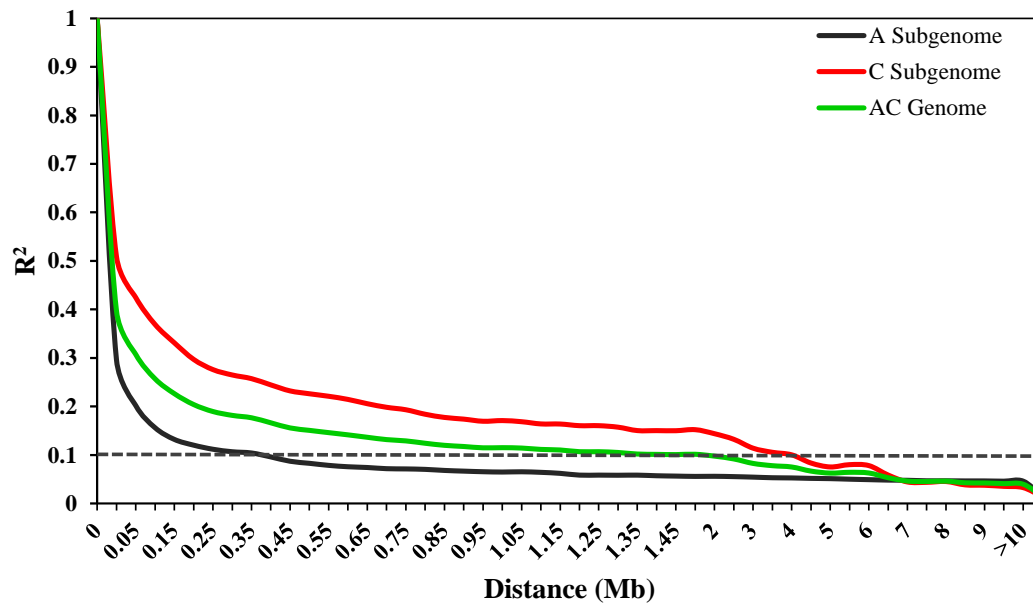

**Fig. S2** The average distance of LD decay in the A and C subgenomes of *B. napus*.

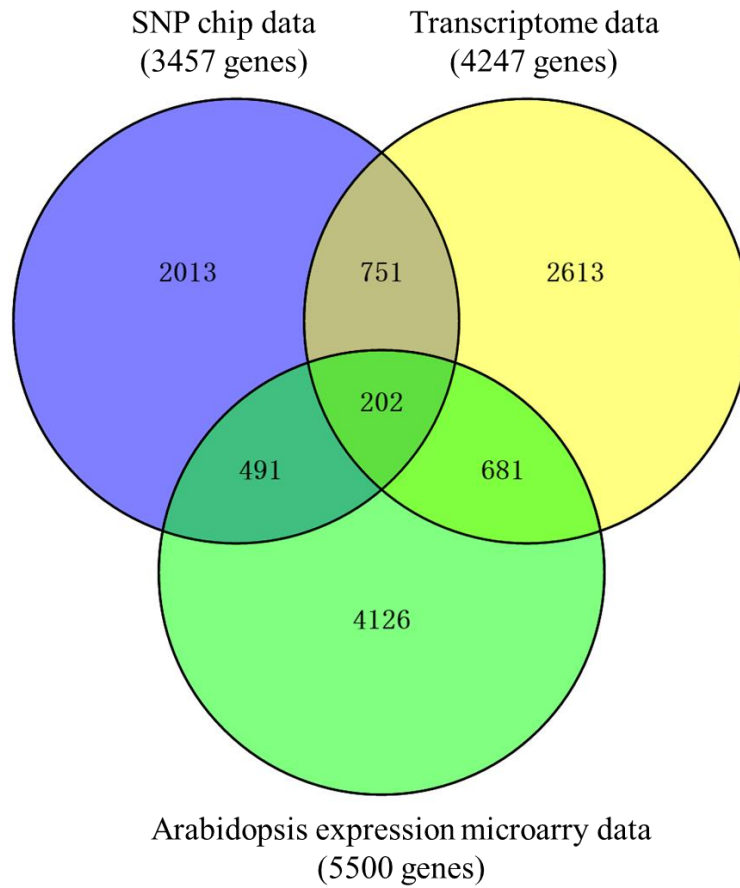

**Fig. S3** Venny plot of overlapped genes among three data sets in rapeseed and *Arabidopsis*. SNP chip data including 3,457 *Arabidopsis* homologous genes (4,304 *B. napus* genes) from the top 5% Fst between winter and spring rapeseed. 4,247 DEGs (differentially expressed genes) from rapeseed detected by transcriptome sequencing and 5,500 DEGs from *Arabidopsis* detected by expression microarray analysis.

**Table S3** The distribution of SNPs across the 19 chromosomes of the rapeseed genome

| <b>Chromosome</b> | <b>SNPs</b> | <b>Size (Mb)</b> | <b>SNPs/100kb</b> | <b>Genes/100kb</b> | <b>Average <math>r^2</math> value</b> | <b>LD decay (Mb) (<math>r^2 = 0.1</math>)</b> |
|-------------------|-------------|------------------|-------------------|--------------------|---------------------------------------|-----------------------------------------------|
| A01               | 1700        | 23.24            | 7                 | 15                 | 0.082                                 | 0.15 - 0.20                                   |
| A02               | 1493        | 24.79            | 6                 | 14                 | 0.100                                 | 0.10 - 0.15                                   |
| A03               | 2416        | 29.73            | 8                 | 18                 | 0.072                                 | 0.10 - 0.15                                   |
| A04               | 1689        | 19.14            | 9                 | 14                 | 0.086                                 | 0.20 - 0.25                                   |
| A05               | 1838        | 23.02            | 8                 | 15                 | 0.096                                 | 0.20 - 0.25                                   |
| A06               | 1783        | 24.39            | 7                 | 15                 | 0.079                                 | 0.10 - 0.15                                   |
| A07               | 2160        | 24.01            | 9                 | 15                 | 0.079                                 | 0.15 - 0.20                                   |
| A08               | 1373        | 18.93            | 7                 | 15                 | 0.150                                 | 1.15 - 1.20                                   |
| A09               | 1745        | 33.86            | 5                 | 15                 | 0.151                                 | 1.15 - 1.20                                   |
| A10               | 1796        | 17.38            | 10                | 16                 | 0.122                                 | 0.45 - 0.50                                   |
| C01               | 2511        | 38.77            | 6                 | 10                 | 0.396                                 | 4.50 - 5.00                                   |
| C02               | 2353        | 46.19            | 5                 | 10                 | 0.280                                 | 5.50 - 6.00                                   |
| C03               | 2828        | 60.56            | 5                 | 12                 | 0.138                                 | 0.60 - 0.65                                   |
| C04               | 3254        | 48.89            | 7                 | 11                 | 0.313                                 | 3.00 - 3.50                                   |
| C05               | 1116        | 43.09            | 3                 | 11                 | 0.110                                 | 0.20 - 0.25                                   |
| C06               | 1466        | 37.19            | 4                 | 11                 | 0.138                                 | 0.80 - 0.85                                   |
| C07               | 1882        | 44.77            | 4                 | 11                 | 0.144                                 | 2.00 - 2.50                                   |
| C08               | 1697        | 38.39            | 4                 | 12                 | 0.173                                 | 4.00 - 4.50                                   |
| C09               | 1141        | 48.5             | 2                 | 10                 | 0.162                                 | 1.05 - 1.10                                   |
| A subgenome       | 17993       | 238.49           | 8                 | 15                 | 0.102                                 | 0.35 - 0.40                                   |
| C subgenome       | 18248       | 406.35           | 4                 | 11                 | 0.206                                 | 3.50 - 4.00                                   |
| Whole genome      | 36241       | 644.84           | 6                 | 13                 | 0.154                                 | 1.35 - 1.45                                   |

**Table S5** Homeologous exchanges between the A and C subgenomes in regions for weak and strong LD

| <b>Subgenomes</b> | <b>No. of blocks</b> | <b>No. of homeologous blocks</b> | <b>Percentage of homeologous blocks</b> |
|-------------------|----------------------|----------------------------------|-----------------------------------------|
| Weak LD regions   |                      |                                  |                                         |
| A                 | 705                  | 267                              | 37.90%                                  |
| C                 | 197                  | 101                              | 51.30%                                  |
| Strong LD regions |                      |                                  |                                         |
| A                 | 168                  | 78                               | 46.40%                                  |
| C                 | 445                  | 205                              | 46.10%                                  |

**Table S6** Sequence features of genome regions with weak and strong LD

| Features                       | weak LD regions |       |       | strong LD regions |       |       |
|--------------------------------|-----------------|-------|-------|-------------------|-------|-------|
|                                | A               | C     | AC    | A                 | C     | AC    |
| No. of blocks                  | 705             | 197   | 902   | 168               | 445   | 613   |
| Block size(Mb)                 | 3.15            | 0.76  | 3.91  | 0.43              | 1.63  | 2.06  |
| Retroelements (%)              | 3.50            | 5.51  | 3.88  | 11.69             | 18.05 | 16.67 |
| DNA Transposons (%)            | 1.06            | 2.27  | 1.29  | 2.02              | 2.79  | 2.63  |
| GC content (%)                 | 36.77           | 36.09 | 36.64 | 32.84             | 34.01 | 33.77 |
| Gene density (No. of genes/Mb) | 337             | 292   | 328   | 197               | 138   | 150   |

**Table S13** QTLs were aligned to selective sweep within the segregation populations derived from hybrid between spring and winter rapeseed reported by Udall *et al.* (2006) and Quijada *et al.* (2006)

| QTL names                         | Trait                                       | Linkage map | Start      | Stop       | Selective sweep regions | Reference                            |
|-----------------------------------|---------------------------------------------|-------------|------------|------------|-------------------------|--------------------------------------|
| <i>hsy1.4</i>                     | Seed yield                                  | A01         | 1,312,320  | 2,979,230  | -                       | Udall et al.2006                     |
| <i>htw1.4</i>                     | Test weight                                 | A01         | 2,978,823  | 5,827,741  | W-01                    | Quijada et al.2006                   |
| <i>hsw1.3</i>                     | Seed weight                                 | A01         | 5,827,413  | 16,321,255 | -                       | Udall et al.2006                     |
| <i>hph1.4</i>                     | Plant height                                | A01         | 16,449,466 | 20,699,444 | -                       | Quijada et al.2006                   |
| <i>hdtf2.1, hph2.1, hld2.3</i>    | Days to flowering, plant height, lodging    | A02         | 32,458     | 3,454,175  | W-02                    | Udall et al.2006                     |
| <i>hph3.1</i>                     | Plant height                                | A03         | 3,508,201  | 6,387,727  | -                       | Quijada et al.2006                   |
| <i>hph3.3, hdtf3.2</i>            | Plant height, days to flowering             | A03         | 4,992,796  | 9,624,656  | -                       | Quijada et al.2006                   |
| <i>hdtf3.3</i>                    | Days to flowering                           | A03         | 4,992,796  | 7,979,595  | -                       | Udall et al.2006                     |
| <i>hph3.5, htw3.3</i>             | Plant height, test weight                   | A03         | 15,547,362 | 20,933,851 | S-08                    | Udall et al.2006                     |
| <i>hsy3.3</i>                     | Seed yield                                  | A03         | 20,933,597 | 27,149,934 | -                       | Udall et al.2006                     |
| <i>hsw5.5</i>                     | Seed weight                                 | A05         | 19,236,244 | 21,080,264 | W-07                    | Udall et al.2006                     |
| <i>hph6.5</i>                     | Plant height                                | A06         | 582,317    | 2,916,544  | -                       | Udall et al.2006                     |
| <i>hdtf6.4</i>                    | Days to flowering                           | A06         | 16,012,424 | 19,675,822 | -                       | Udall et al.2006                     |
| <i>hph7.3</i>                     | Plant height                                | A07         | 861,231    | 6,968,437  | -                       | Quijada et al.2006                   |
| <i>hdtf7.5, hph7.3; hsy7.4</i>    | Days to flowering, plant height, seed yield | A07         | 11,205,929 | 13,444,905 | -                       | Udall et al.2006; Quijada et al.2006 |
| <i>hsy7.2</i>                     | Seed yield                                  | A07         | 13,444,128 | 14,751,299 | -                       | Quijada et al.2006                   |
| <i>hdtf9.1</i>                    | Days to flowering                           | A09         | 2,809,819  | 8,636,824  | -                       | Quijada et al.2006                   |
| <i>hsy10.3</i>                    | Seed yield                                  | A10         | 1,359,823  | 6,116,215  | W-19, S-10              | Udall et al.2006                     |
| <i>hsy10.2, hld10.4</i>           | Seed yield, lodging                         | A10         | 6,115,478  | 9,869,889  | -                       | Udall et al.2006                     |
| <i>hph10b.3, hsy10.2; hsy10.4</i> | Plant height, seed yield                    | A10         | 9,869,157  | 13,259,907 | -                       | Quijada et al.2006; Udall et al.2006 |



|                                                                     |                                             |     |            |            |                              |                                      |
|---------------------------------------------------------------------|---------------------------------------------|-----|------------|------------|------------------------------|--------------------------------------|
| <i>hph11.3</i>                                                      | Plant height                                | C01 | 3,065,649  | 3,319,900  | -                            | Udall et al.2006                     |
| <i>hdtf12a.1, hph12a.3, hdtf12a.3; hdtf12.3, hph12.3, hdtf12.5,</i> | Days to flowering, plant height             | C02 | 210,364    | 6,707,092  | -                            | Quijada et al.2006; Udall et al.2006 |
| <i>hdtf12.4</i>                                                     | Days to flowering                           | C02 | 5,566,513  | 6,707,092  | -                            | Udall et al.2006                     |
| <i>hdtf12b.1, hph12b.1, hsy12.1</i>                                 | Days to flowering, plant height, seed yield | C02 | 18,682,450 | 31,673,880 | from W-22 to W-30            | Quijada et al.2006                   |
| <i>hdtf12.4</i>                                                     | Days to flowering                           | C02 | 42,040,528 | 42,121,017 | -                            | Udall et al.2006                     |
| <i>hsy13.3</i>                                                      | Seed yield                                  | C03 | 1,814,372  | 5,734,971  | -                            | Quijada et al.2006                   |
| <i>hdtf13a.3</i>                                                    | Days to flowering                           | C03 | 9,154,164  | 12,284,613 | -                            | Udall et al.2006                     |
| <i>hsw13.3, hsy13.3</i>                                             | Seed weight, seed yield                     | C03 | 17,837,356 | 23,464,136 | W-33                         | Udall et al.2006                     |
| <i>hdtf13.4</i>                                                     | Days to flowering                           | C03 | 21,268,069 | 29,017,005 | W-33, S-16, S-17             | Udall et al.2006                     |
| <i>htw13.1</i>                                                      | Test weight                                 | C03 | 23,463,567 | 29,017,005 | S-16, S-17                   | Quijada et al.2006                   |
| <i>hdtf13b.3</i>                                                    | Days to flowering                           | C03 | 32,464,543 | 35,072,240 | -                            | Udall et al.2006                     |
| <i>hsy15.2</i>                                                      | Seed yield                                  | C05 | 7,497,270  | 8,114,484  | -                            | Quijada et al.2006                   |
| <i>hoil15.1</i>                                                     | Oil content                                 | C05 | 24,720,692 | 32,521,022 | -                            | Udall et al.2006                     |
| <i>htw15.2, htw15.4</i>                                             | Test weight                                 | C05 | 39,500,896 | 41,027,393 | W-38, W-39                   | Quijada et al.2006                   |
| <i>htw16.4</i>                                                      | Test weight                                 | C06 | 9,571,031  | 16,634,369 | W-40, S-20, S-21             | Udall et al.2006                     |
| <i>hoil17.1</i>                                                     | Oil content                                 | C07 | 16,194,996 | 27,842,805 | W-44, W-45, W-46, S-22, S-23 | Udall et al.2006                     |
| <i>hld19.3</i>                                                      | lodging                                     | C09 | 8,497,788  | 17,390,896 | W-50, W-51, S-26, S-27       | Udall et al.2006                     |
| <i>hsw19.3</i>                                                      | Seed weight                                 | C09 | 37,799,232 | 43,593,715 | W-53                         | Quijada et al.2006                   |
| <i>hph19.5, hdtf19.5</i>                                            | Plant height, days to flowering             | C09 | 43,171,116 | 46,370,507 | -                            | Udall et al.2006                     |
